# Supplementary material
Source: MDPI journal article supplement (https://www.mdpi.com/2571-8789/6/2/53)
Supplement: s1 [file s1]

Table S1. Portable OSL signal of soil pit samples STM, SSJG, and BGR

| Sample                  | Depth (cm) | IRSL (photon counts/min) | Post IR-OSL (photon counts/min) | IRSL/OSL Ratio (–) | Colour (Munsell)                   | Charcoal content (area %) |
|-------------------------|------------|--------------------------|---------------------------------|--------------------|------------------------------------|---------------------------|
| <b>Urban core site</b>  |            |                          |                                 |                    |                                    |                           |
| STM                     | 14         | 2462 ± 69                | 6363 ± 93                       | 0.39               | 10YR 2/1 (black)                   | 0.97                      |
|                         | 34         | 10443 ± 113              | 42839 ± 212                     | 0.24               | 10YR 2/2 (very dark brown)         | 1.43                      |
|                         | 50         | 1095 ± 58                | 4338 ± 81                       | 0.25               | 2.5YR 3/1 (dark reddish gray)      | 7.34                      |
|                         | 71         | 4368 ± 82                | 25102 ± 165                     | 0.17               | 2.5YR 3/1 (dark reddish gray)      | 4.88                      |
|                         | 88         | 7316 ± 98                | 29803 ± 179                     | 0.25               | 2.5YR 7/6 (light red)              | 6.38                      |
| SSJG                    | 16         | 280 ± 51                 | 804 ± 56                        | 0.35               | 7.5YR 2.5/1 (black)                | 12.70                     |
|                         | 44         | 445 ± 52                 | 1033 ± 58                       | 0.43               | 7.5YR 3/1 (very dark gray)         | 4.84                      |
|                         | 62         | 538 ± 53                 | 1367 ± 60                       | 0.39               | 10YR 3/2 (very dark grayish brown) | 5.24                      |
|                         | 94         | 639 ± 54                 | 1508 ± 62                       | 0.42               | 10YR 3/3 (dark brown)              | 7.61                      |
| <b>Extra urban site</b> |            |                          |                                 |                    |                                    |                           |
| BGR                     | 6          | 1495 ± 61                | 2823 ± 71                       | 0.53               | 7.5YR 2.5/1 (black)                | 1.63                      |
|                         | 29         | 960 ± 57                 | 3003 ± 73                       | 0.32               | 10YR 2/2 (very dark brown)         | 3.16                      |
|                         | 42         | 3824 ± 78                | 11718 ± 118                     | 0.33               | 7.5YR 3/2 (dark brown)             | 1.73                      |
|                         | 61         | 66564 ± 262              | 81771 ± 290                     | 0.81               | 5YR 4/4 (reddish brown)            | 1.05                      |
