# Supplementary material
Source: MDPI journal article supplement (https://www.mdpi.com/2571-8789/6/2/53)
Supplement: s1 [file s1]

Table S2. Relative contributions of organic C functional groups in auger samples as resolved by  $^{13}\text{C}$ -CPMAS NMR spectroscopy; soil particle size distribution [reproduced from Esiana et al. 2021]

| Sample Location                      | Sample Depth (cm) | % Alkyl C (0-45 ppm) | % O/N-Alkyl C (45-90 ppm) | % Anomeric C (90-110 ppm) | % Aromatic C (110-160 ppm) | % Carboxyl C (160-220 ppm) | Alkyl C to O/N-Alkyl C | Aromaticity (%) | Clay (%) | Silt (%) | Fine Sand (%) |
|--------------------------------------|-------------------|----------------------|---------------------------|---------------------------|----------------------------|----------------------------|------------------------|-----------------|----------|----------|---------------|
| <b>Medieval Urban Centre</b>         |                   |                      |                           |                           |                            |                            |                        |                 |          |          |               |
| <b>St Andrews Trust Museum (STM)</b> | 0-20              | 21                   | 15                        | 4                         | 50                         | 11                         | 1.40                   | 55.6            | 3.4      | 51.71    | 33.30         |
|                                      | 20-35             | 19                   | 12                        | 3                         | 54                         | 11                         | 1.58                   | 61.4            | 3.1      | 51.42    | 30.50         |
|                                      | 35-45             | 20                   | 11                        | 3                         | 54                         | 12                         | 1.82                   | 61.4            | 4.8      | 47.13    | 34.70         |
|                                      | 45-55             | 19                   | 10                        | 3                         | 57                         | 11                         | 1.90                   | 64.0            | 5.2      | 62.93    | 29.80         |
| <b>South Street (SST)</b>            | 0-20              | 22                   | 17                        | 4                         | 45                         | 12                         | 1.29                   | 51.1            | 4.1      | 64.01    | 30.60         |
|                                      | 20-30             | 20                   | 11                        | 3                         | 54                         | 11                         | 1.82                   | 61.4            | 6.0      | 71.01    | 22.50         |
|                                      | 30-40             | 21                   | 12                        | 4                         | 53                         | 10                         | 1.75                   | 58.9            | 11.0     | 89.00    | 0.00          |
|                                      | 40-50             | 22                   | 15                        | 4                         | 48                         | 11                         | 1.47                   | 53.9            | 10.1     | 89.86    | 0.04          |
| <b>St Johns Garden (SSJG)</b>        | 0-20              | 23                   | 17                        | 5                         | 43                         | 13                         | 1.35                   | 48.9            | -        | -        | -             |
|                                      | 20-35             | 21                   | 12                        | 4                         | 52                         | 11                         | 1.75                   | 58.4            | -        | -        | -             |
|                                      | 35-50             | 18                   | 10                        | 3                         | 58                         | 11                         | 1.80                   | 65.2            | -        | -        | -             |
|                                      | 50-60             | 20                   | 10                        | 4                         | 56                         | 11                         | 2.00                   | 62.2            | -        | -        | -             |
| <b>Extra Urban Site</b>              |                   |                      |                           |                           |                            |                            |                        |                 |          |          |               |
| <b>Buchanan Gardens (BGR)</b>        | 0-20              | 24                   | 19                        | 4                         | 42                         | 12                         | 1.26                   | 47.2            | 6.6      | 68.60    | 24.30         |
|                                      | 20-30             | 19                   | 15                        | 4                         | 50                         | 12                         | 1.27                   | 56.8            | 7.3      | 69.52    | 22.70         |
|                                      | 30-40             | 20                   | 14                        | 5                         | 50                         | 12                         | 1.43                   | 56.2            | 8.4      | 55.64    | 34.60         |
|                                      | 40-50             | 22                   | 17                        | 4                         | 46                         | 11                         | 1.29                   | 51.7            | 17.7     | 82.30    | 0.00          |

Esiana B.O.I, Coates C.J, Adderley W.P, Berns A.E, Bol R (2021) Phenoloxidase activity and organic carbon dynamics in historic Anthrosols in Scotland, UK. PLoS ONE 16(10): e0259205. <https://doi.org/10.1371/journal.pone.025920>
